# Supplementary material for: Meeting Summary: Exploring Cloud Dynamics with Cloud Model 1 and 3D Visualization – insights from a University Modeling Workshop
Source: Copernicus journal article supplement (doi:10.5194/egusphere-2023-2700), 2023-11-17
Supplement: Supplementary file [file egusphere-2023-2700-RC2-supplement.pdf]

**Recommendation:** Minor revisions

**Summary:** The paper outlines a 2-week block course designed to teach participants how to run the CM1 model and use state-of-the-art visualization tools to analyze the data. Detailed lesson plans are also provided, enabling instructors to easily adopt the material. The paper is well-written, and I only have a handful of minor suggestions.

**General comments:**

1. Can the authors provide a URL pointing directly to the course material? I landed on a German webpage that I found hard to navigate (I struggled a bit finding the course content).
2. Perhaps use “participant” rather than “student”?

**Specific comments:**

1. Line 2: CM1 is actually convection *resolving* (not only convection *permitting*).
2. Line 10: Suggest adding “e.g.” before the reference.
3. Line 21: Use state-of-the-art instead of up-to-date? And again, consider “cloud resolving” instead of convection permitting.
4. Line 25: run → documented?
5. Lines 48, 49: Replace “chapter” with “section”
6. Line 55: Did the participants have to produce the 20 page report within the 2-week period?
7. Line 67: Here and elsewhere: Instead of single-computer, consider “single-processor” or “serial application”
8. Line 80: Is this level of detail needed (background of individual participants)?
9. Line 81: Suggest rewording: Not or only partially covered.
10. Line 94: How did the participant quantify the degree of lift in the field?
11. Line 104: Higher-resolution: Compared to what—perhaps report the grid spacing used in the different simulations?
12. Line 111, section header: Instead of “classic” perhaps use “intermediate”? The term “classic supercell” is usually part of the “high-precipitation”, “classic”, “low-precipitation” trio.
13. Line 125: Add a reference here?
14. Line 157: Replace “Fazit” with “feedback”, and consider removing “and co-author to this paper”
